# Supplementary material for: Controllable polymeric pseudo-crown ether fluorescent sensors: responsiveness and selective detection of metal ions
Source: Royal Society of Chemistry journal article supplement (doi:10.1039/d0nj05201a), 2020-12-28
Supplement: d0nj05201a1.pdf [file d0nj05201a1.pdf]

## *Supporting Information*

### **Controllable Polymeric Pseudo-Crown Ether Fluorescent Sensors: Responsiveness and Selective Detection of Metal Ions**

Le Zhao<sup>1†</sup>, Yong-Guang Jia<sup>1,3†</sup>, Song Meng Wang<sup>1</sup>, Yi Yang<sup>1</sup>, Ling Yan Liu<sup>\*1</sup>, Wei Xing Chang<sup>1</sup>, and Jing Li<sup>\*1,2</sup>

<sup>1</sup> the State Key Laboratory and Institute of Elemento-Organic Chemistry, College of Chemistry, Nankai University, Tianjin 300071, P. R. China

<sup>2</sup> Collaborative Innovation Center of Chemical Science and Engineering (Tianjin), Weijin Road 94#, Nankai District, Tianjin 300071, P. R. China

<sup>3</sup> School of Materials Science and Engineering, South China University of Technology, Guangzhou 510641, P. R. China

<sup>†</sup> Co-first author

<sup>\*</sup> E-mail: \*liulingyan@nankai.edu.cn, \*lijing@nankai.edu.cn.

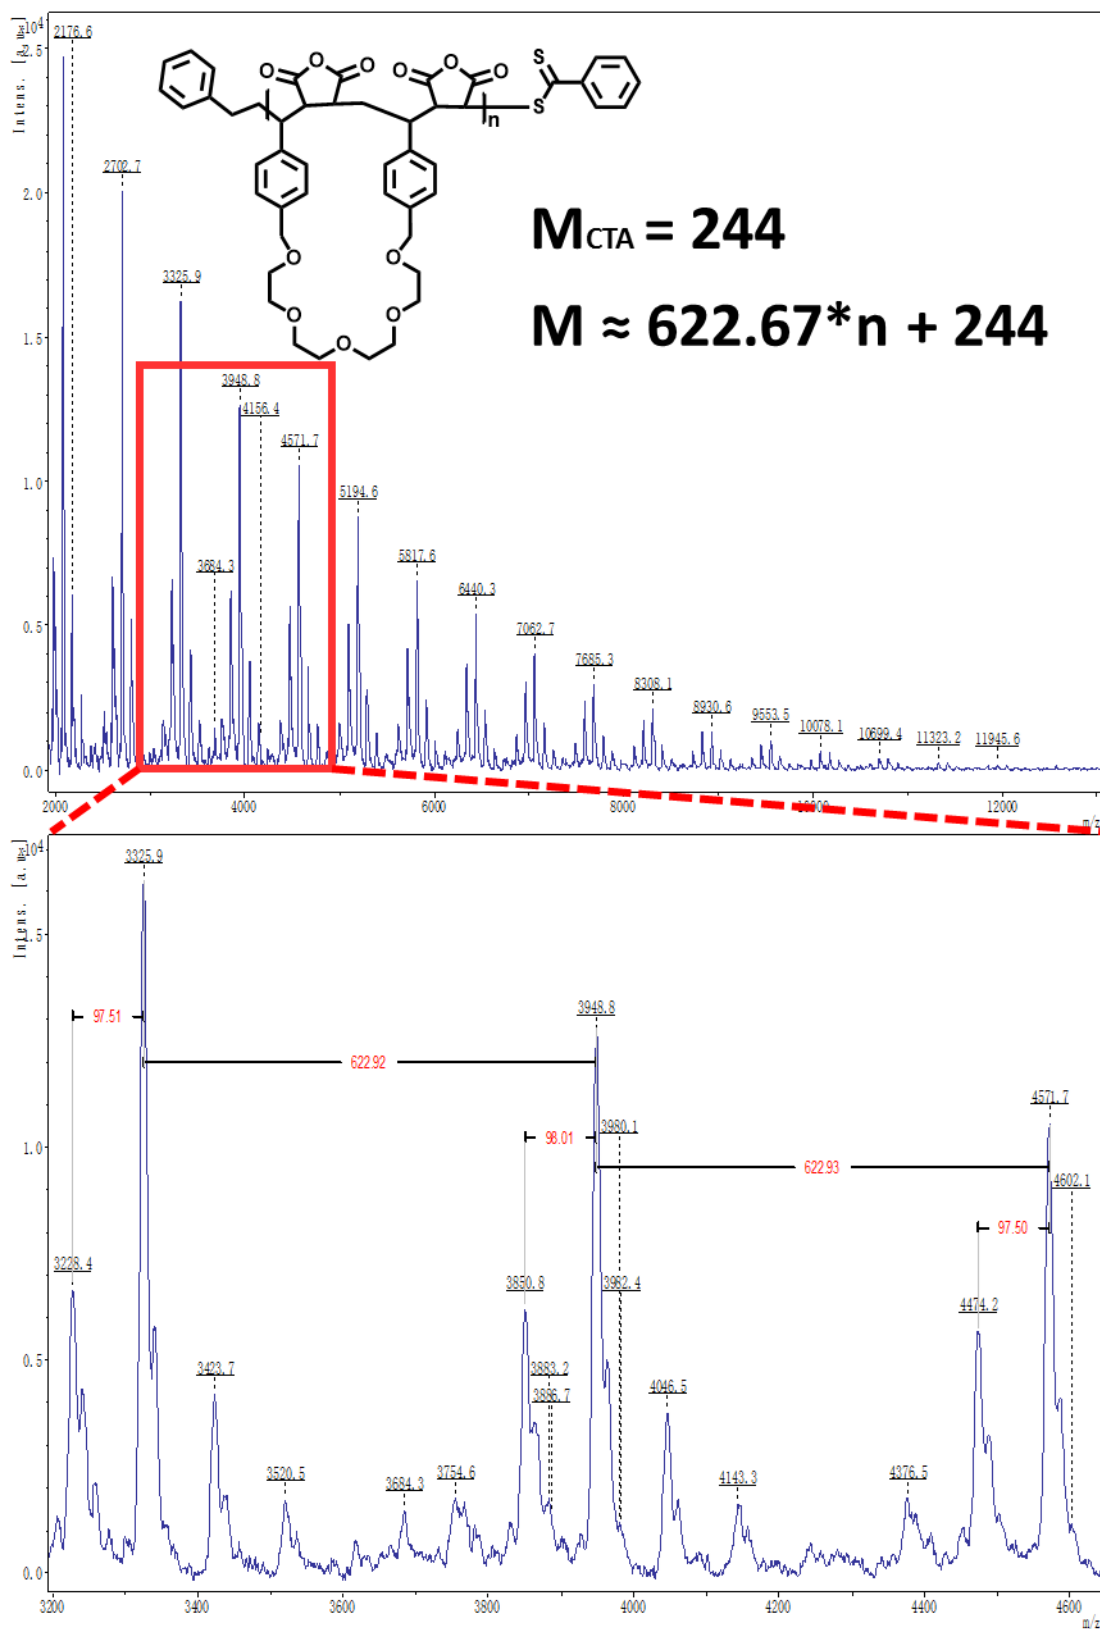

**Figure S1.** MALDI-TOF mass spectrum of copolymer **PDSM1** (top) and an enlarged zone (bottom)

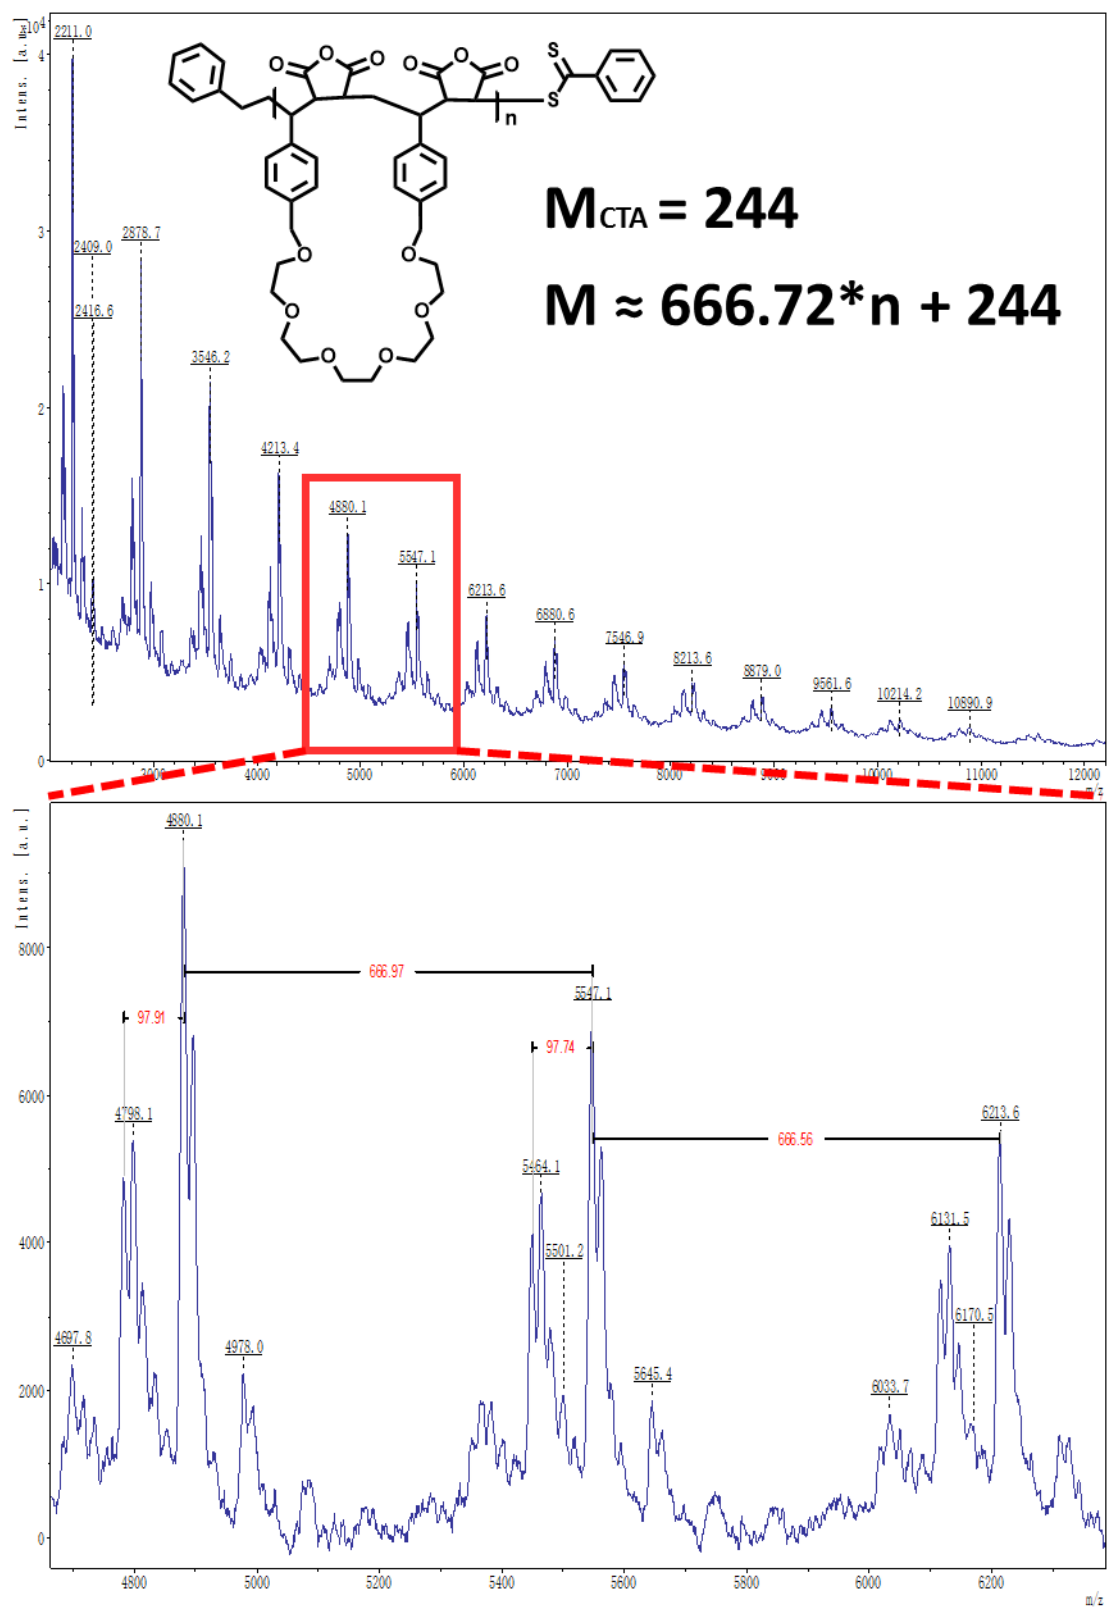

**Figure S2.** MALDI-TOF mass spectrum of copolymer **PDSM2** (top) and an enlarged zone (bottom)

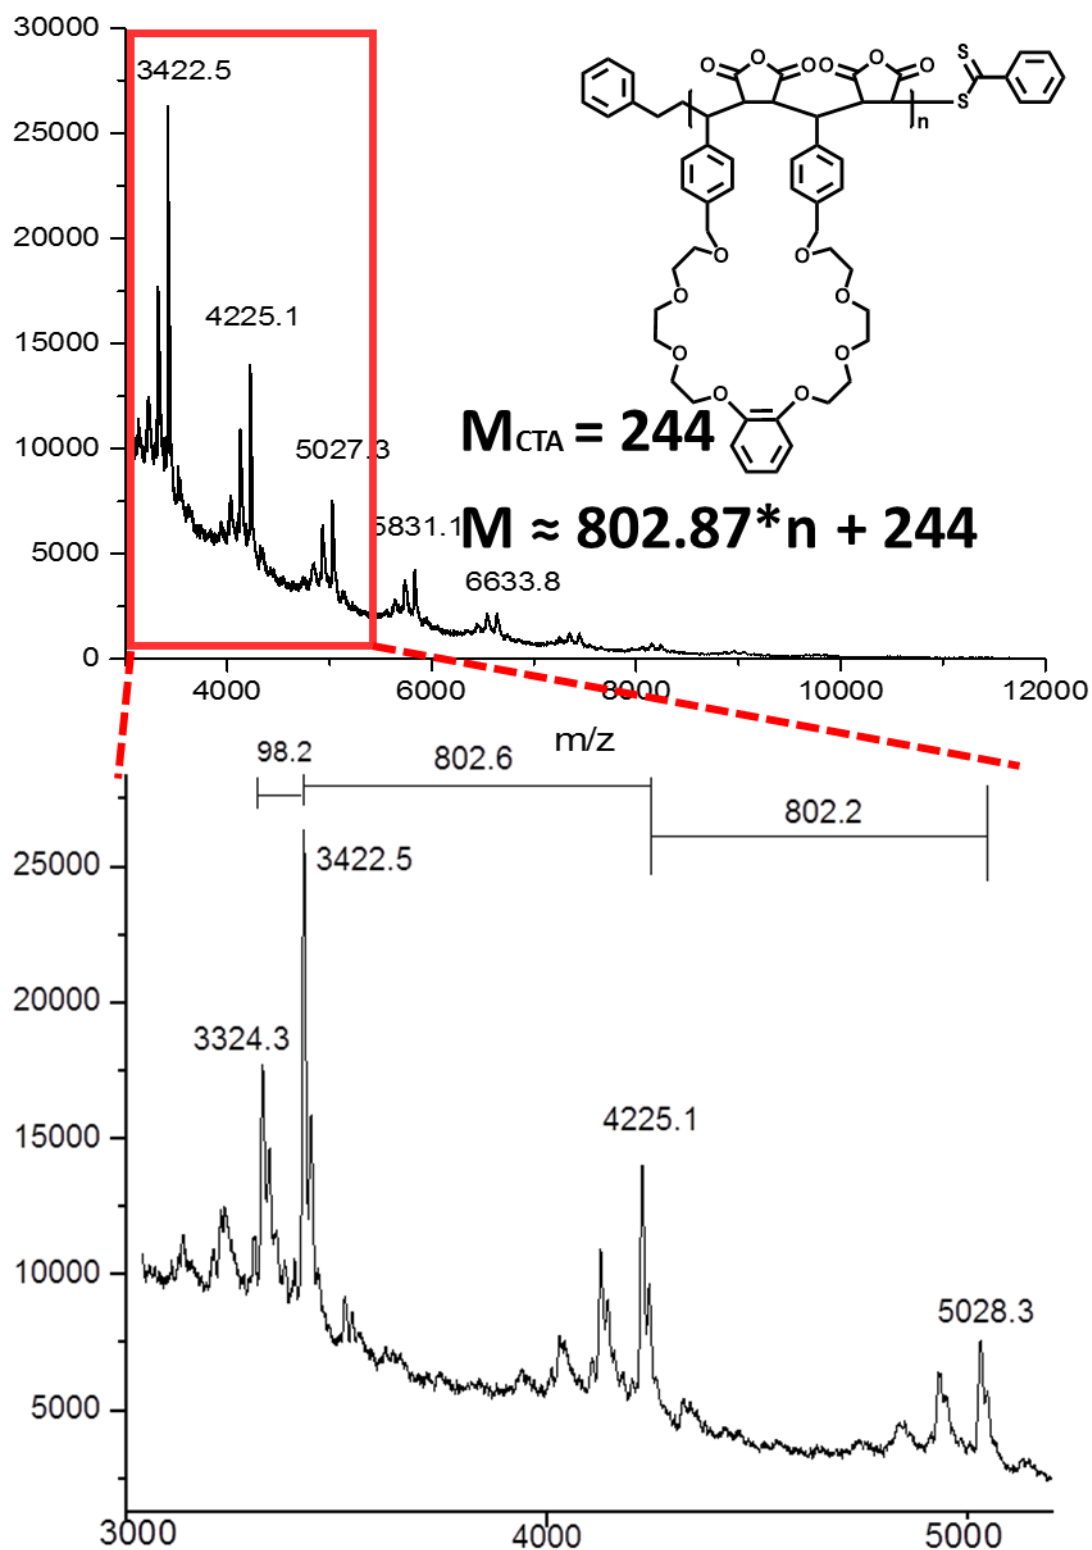

**Figure S3.** MALDI-TOF mass spectrum of copolymer **PDSM3** (top) and an enlarged zone (bottom)

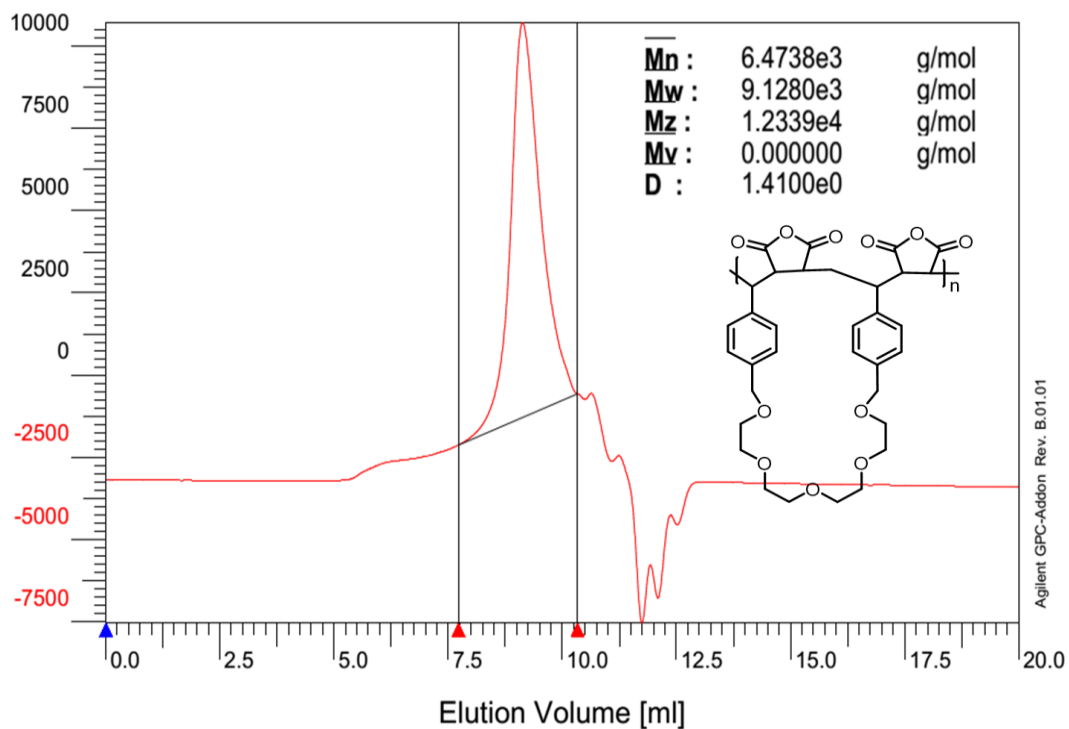

**Figure S4. GPC curve of PDSM1**

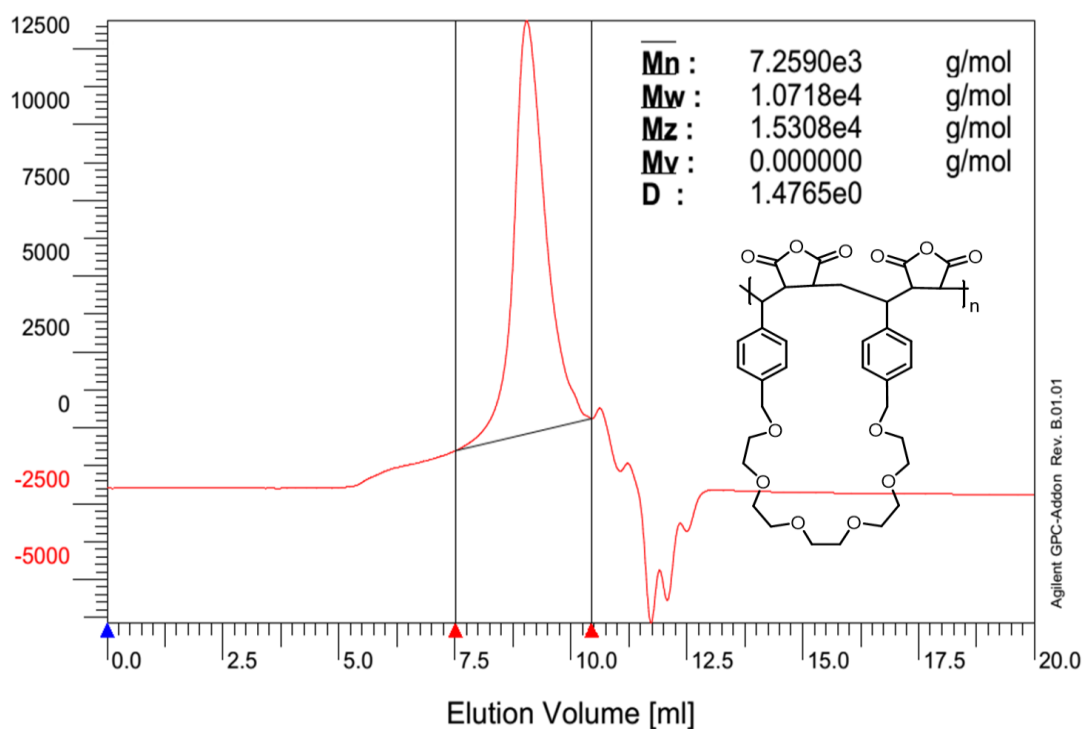

**Figure S5. GPC curve of PDSM2**

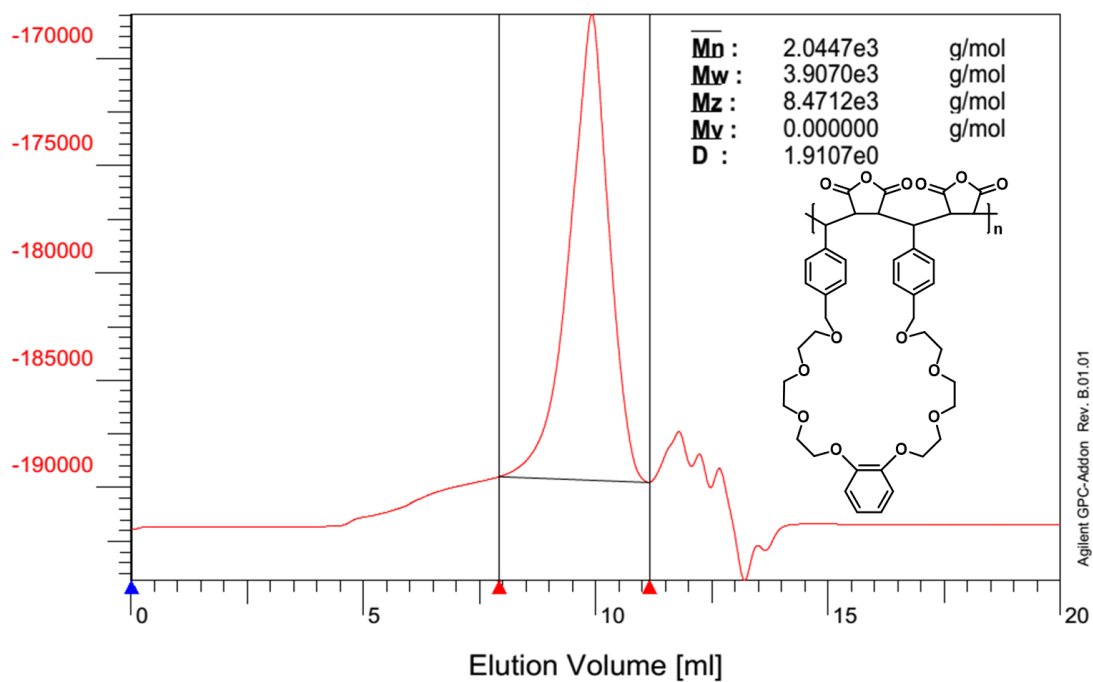

Figure S6. GPC curve of **PDSM3**

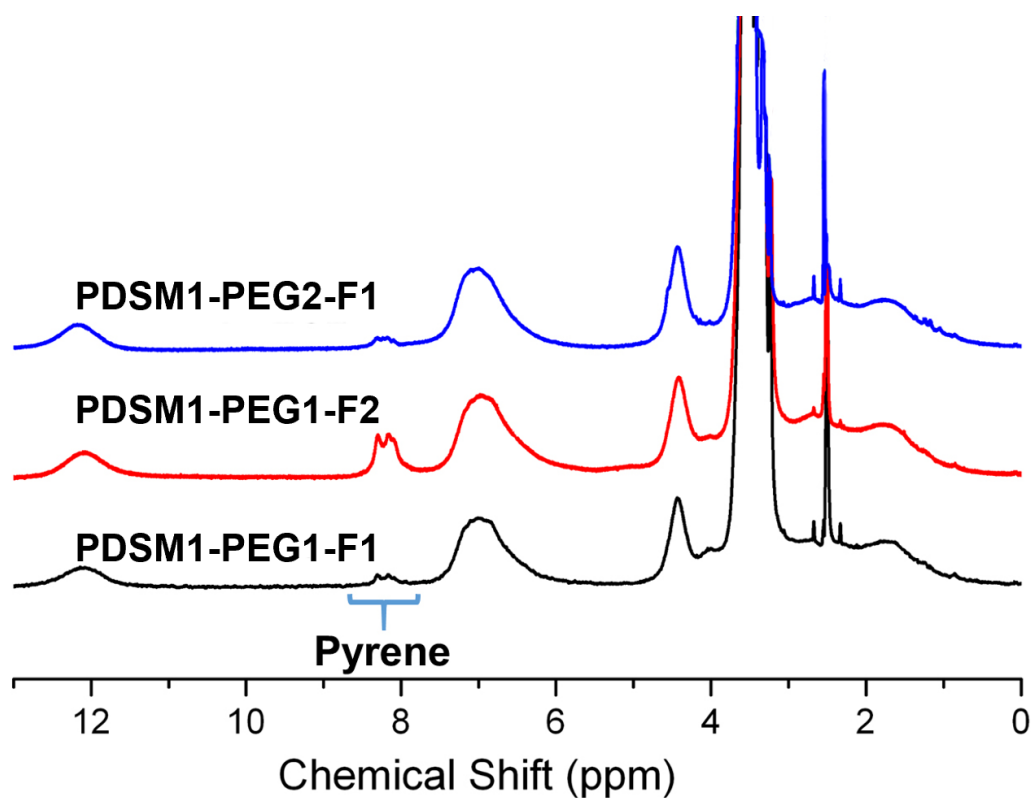

Figure S7.  $^1\text{H}$  NMR spectra of **PDSM-PEG-F** ( $\text{DMSO-}d_6$ , 25  $^\circ\text{C}$ )

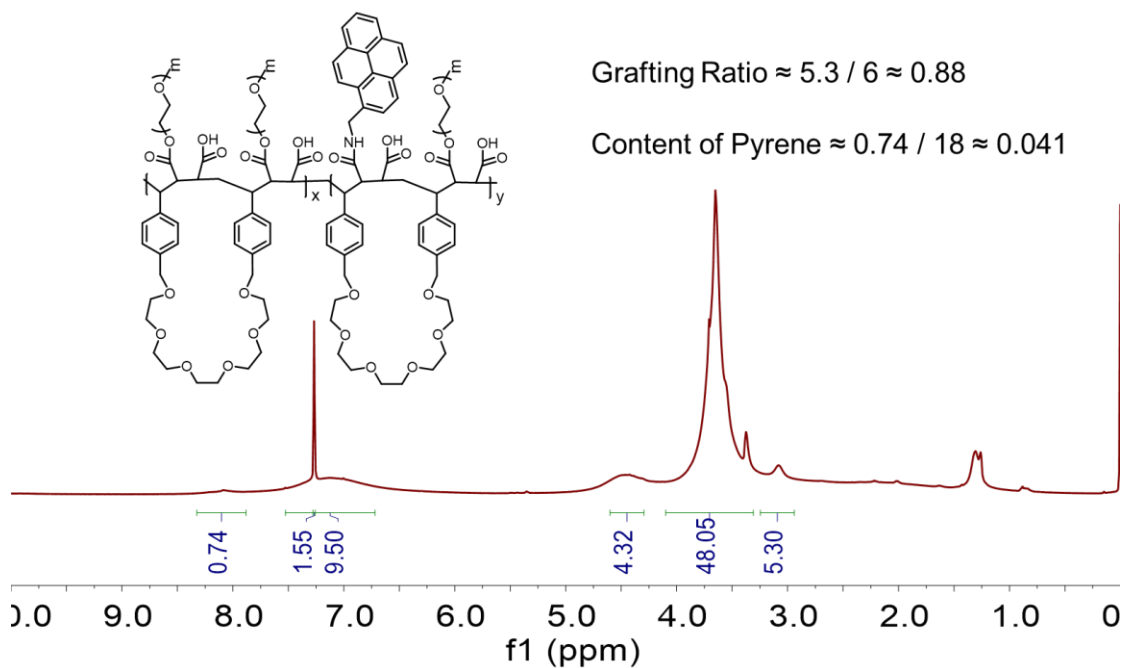

Figure S8.  $^1\text{H}$  NMR spectrum of PDSM2-PEG1-F1 ( $\text{CDCl}_3$ , 25  $^\circ\text{C}$ )

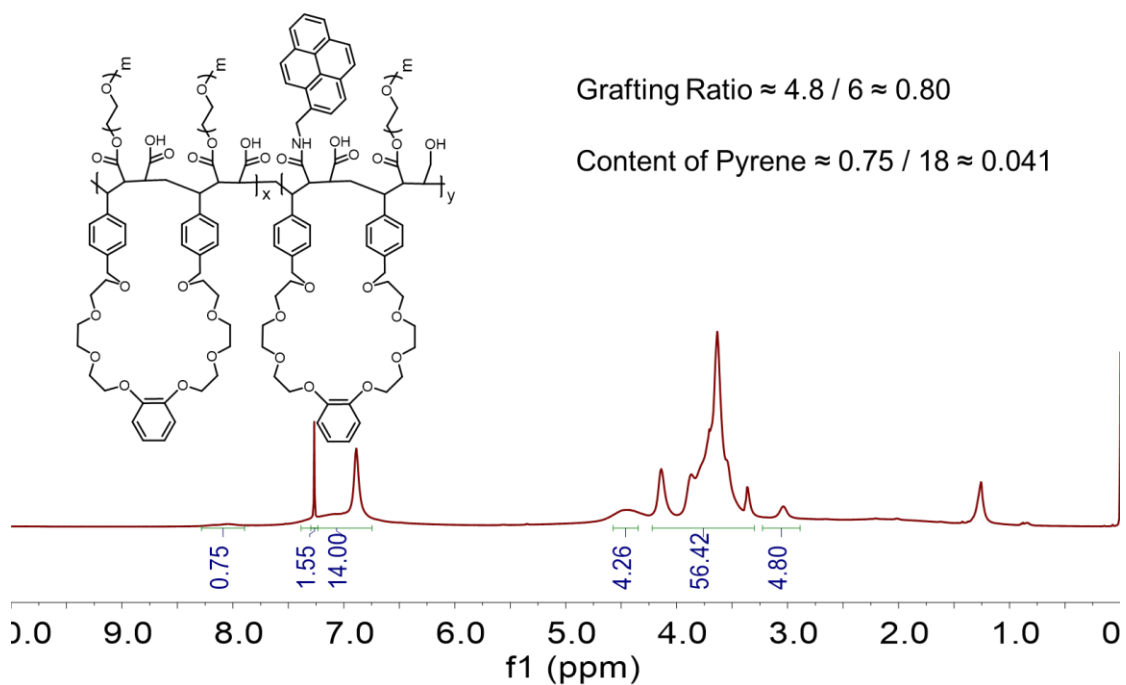

Figure S9.  $^1\text{H}$  NMR spectrum of PDSM3-PEG1-F1 ( $\text{CDCl}_3$ , 25  $^\circ\text{C}$ )

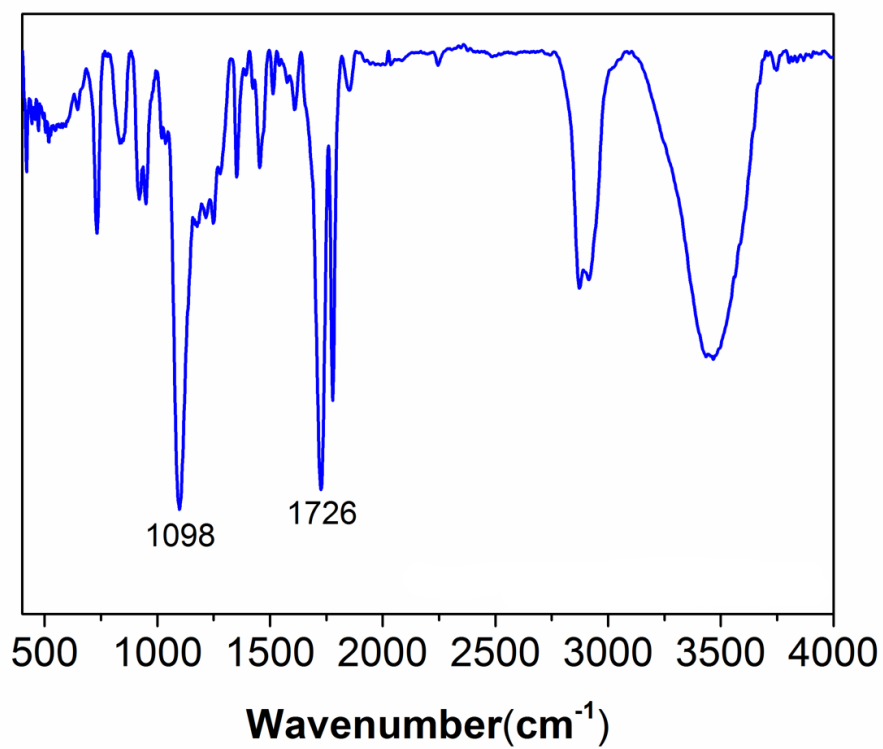

**Figure S10.** FT-IR spectrum of the grafting cyclopolymer **PDSM2-PEG1-F1**

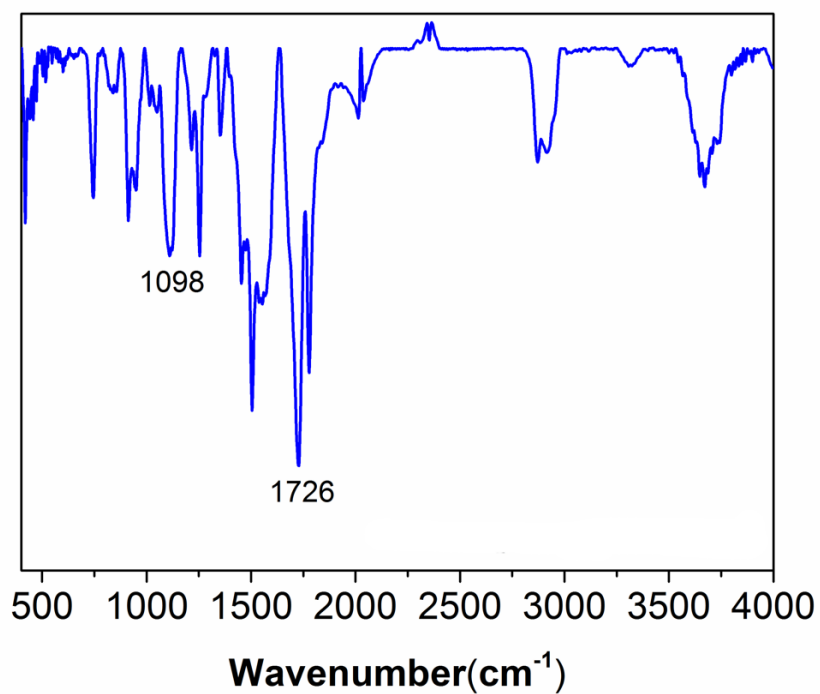

**Figure S11.** FT-IR spectrum of the grafting cyclopolymer **PDSM3-PEG1-F1**



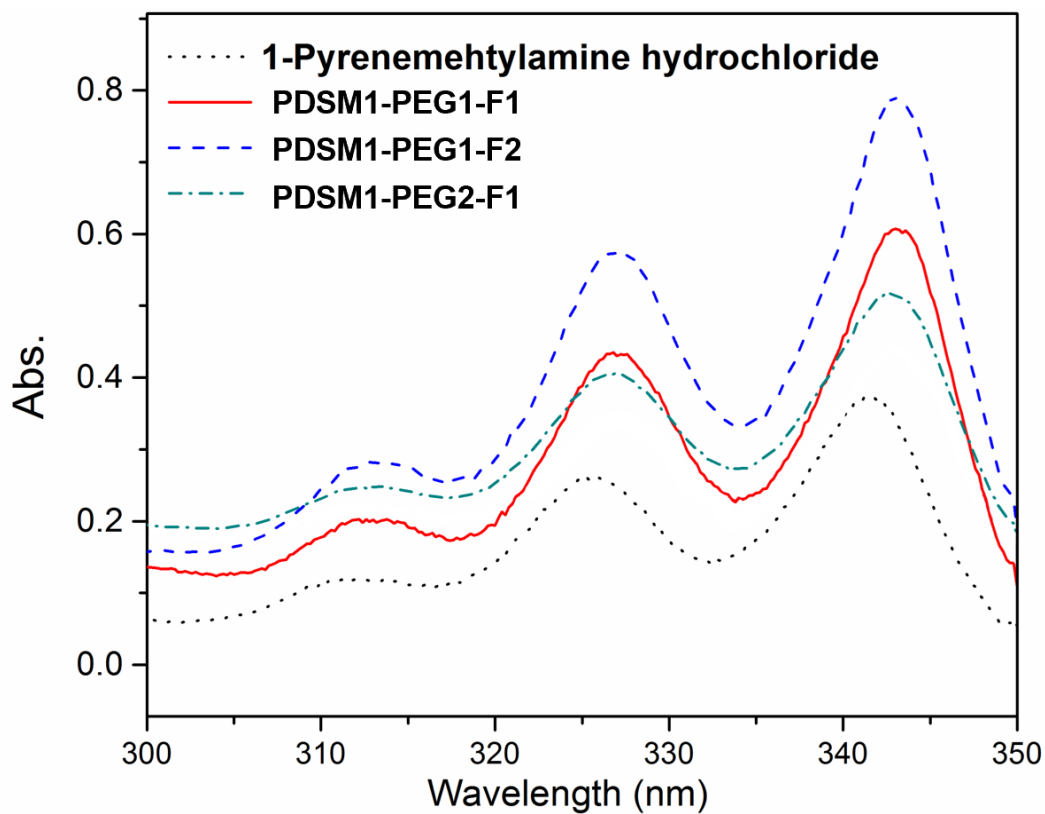

**Figure S12.** UV-vis spectra of 1-Pyrenemethylamine hydrochloride and **PDSM-PEG-F** (THF : H<sub>2</sub>O = 1 : 1, [1-Pyrenemethylamine hydrochloride] =  $1 \times 10^{-4}$  mol/L, [**PDSM-PEG-F**] =  $2.5 \times 10^{-2}$  g/L)

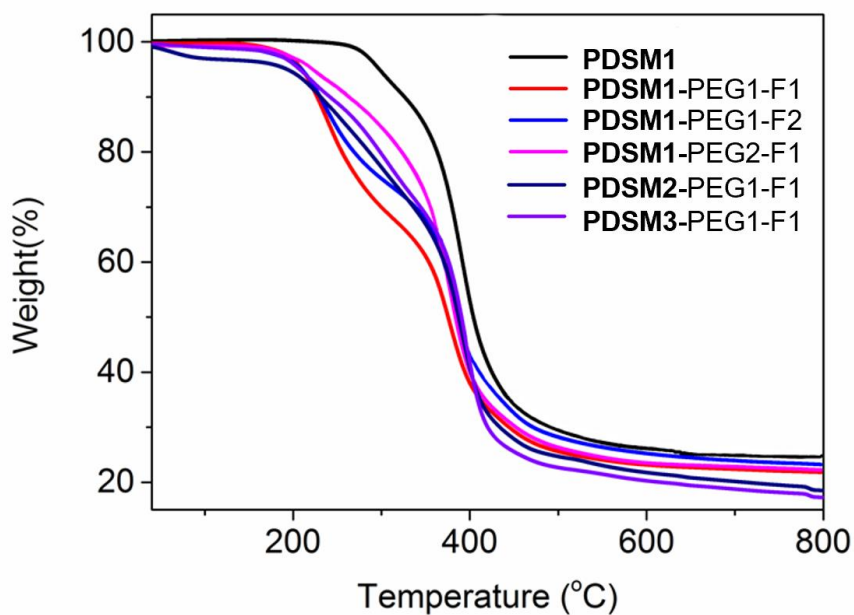

**Figure S13.** TGA profiles for the different **PDSM-PEG-F** copolymers

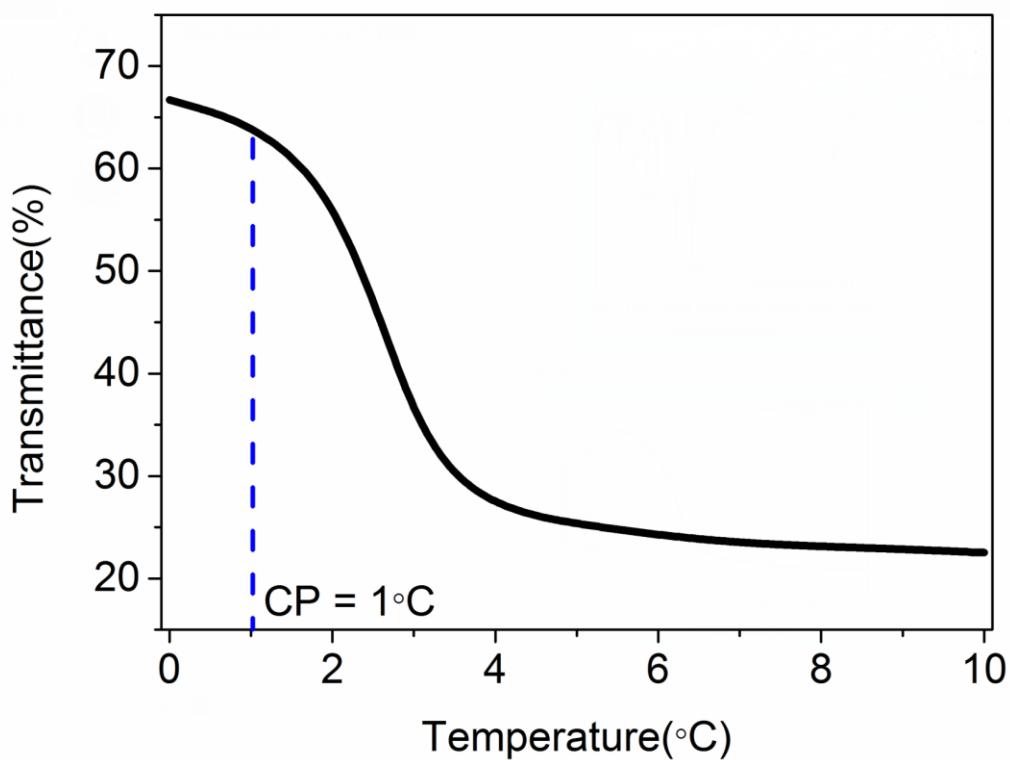

Figure S14. TGA profiles for the different PDSM2-PEG1-F1 copolymers

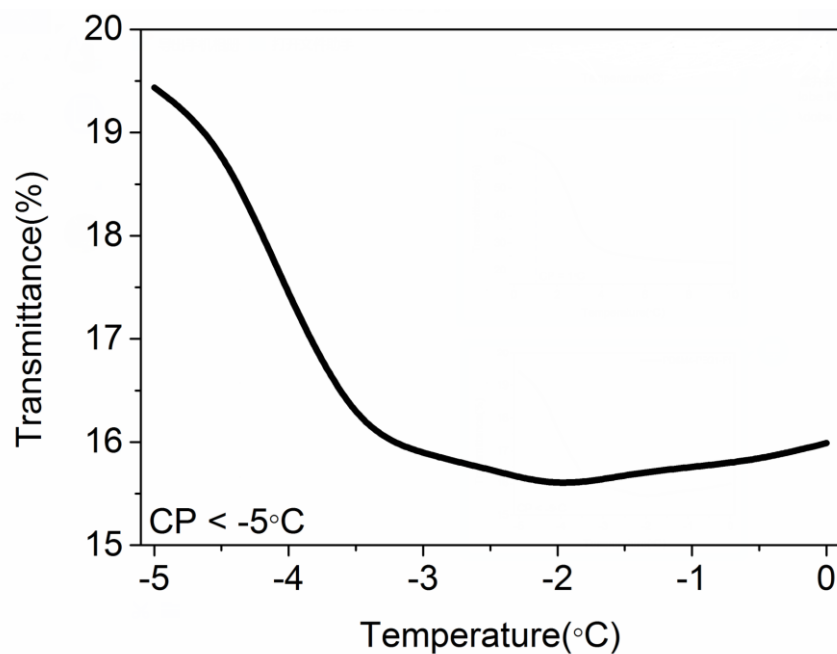

Figure S15. TGA profiles for the different PDSM3-PEG1-F1 copolymers

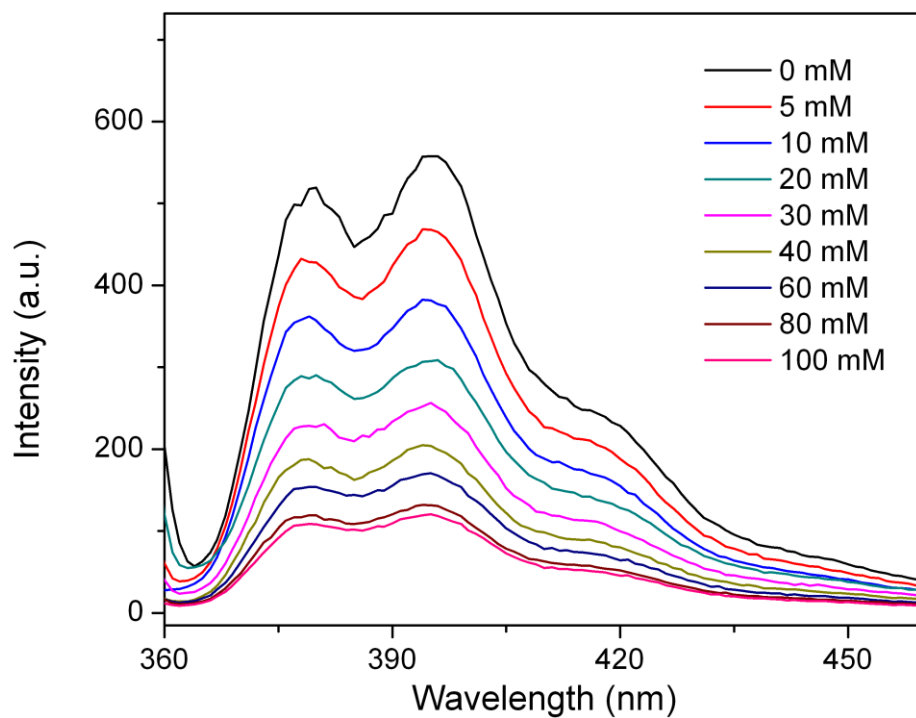

**Figure S16.** Fluorescent spectra of pyrene after adding  $\text{Cu}^{2+}$  under room-temperature ( $\text{pH} = 2.0$ ,  $\lambda_{\text{excitation}} = 345 \text{ nm}$ , slit width = 5 nm,  $[\text{Pyrene}] = 10^{-7} \text{ M}$ )

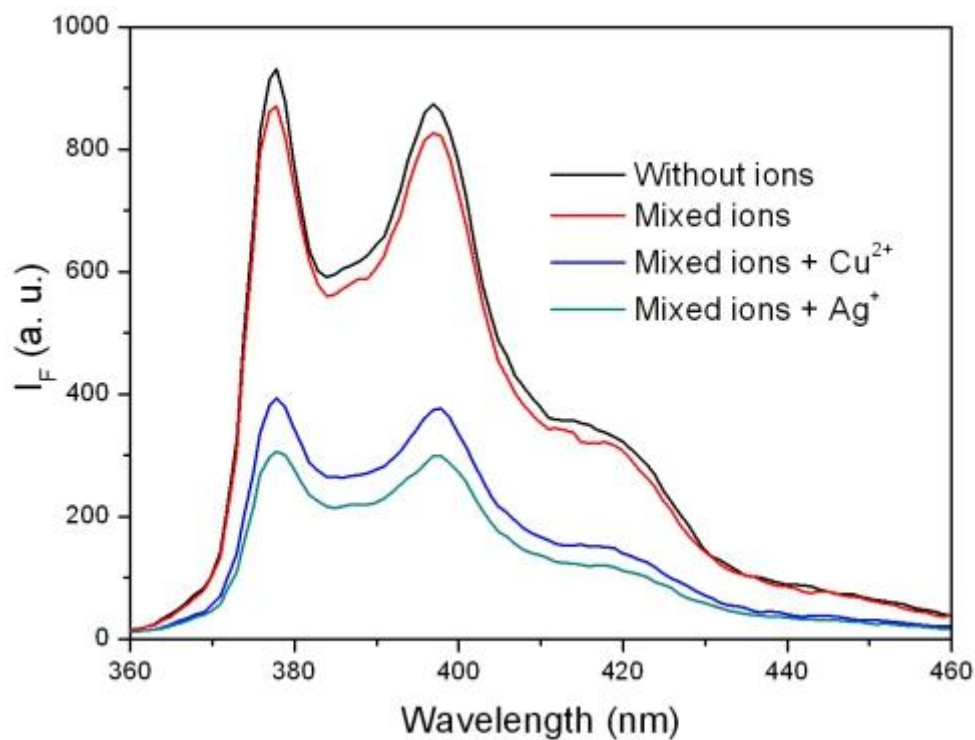

**Figure S17.** Interference of Metal ions on the detection of PDSM1-PEG1-F1 to  $\text{Cu}^{2+}$  or  $\text{Ag}^+$ , Mixed ions:  $\text{K}^+$ ,  $\text{Na}^+$ ,  $\text{Mg}^{2+}$ ,  $\text{Ca}^{2+}$  and  $\text{Fe}^{3+}$ , 10  $\mu\text{M}$  to each metal ion.

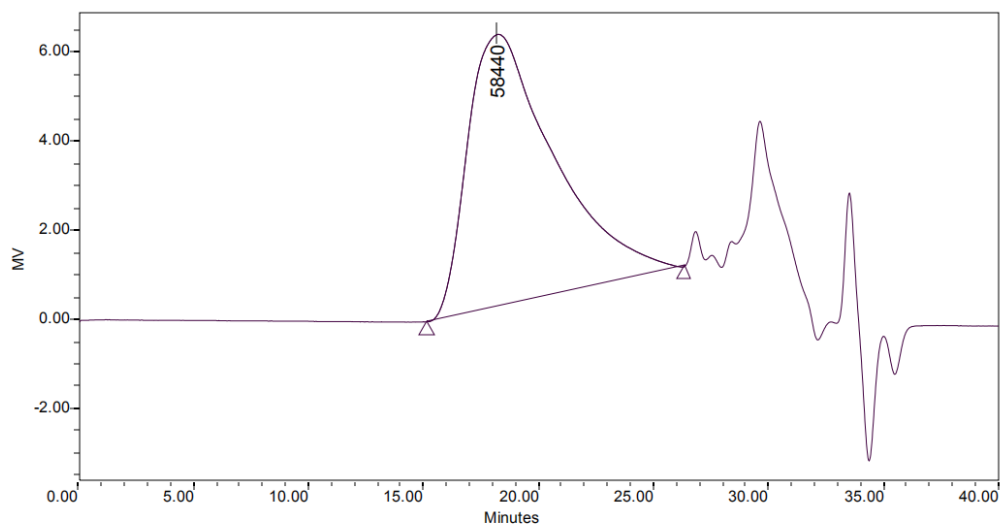

**Broad Unknown Relative Peak Table**

| Distribution Name | Mn (Daltons) | Mw (Daltons) | MP (Daltons) | Mz (Daltons) | Mz+1 (Daltons) | Polydispersity | Mz/Mw    | Mz+1/Mw  |
|-------------------|--------------|--------------|--------------|--------------|----------------|----------------|----------|----------|
| 1                 | 24317        | 56453        | 58440        | 106503       | 170994         | 2.321527       | 1.886568 | 3.028955 |

**Figure S18.** The GPC of polystyrene-*co*-polymaleic anhydride (PSMA).

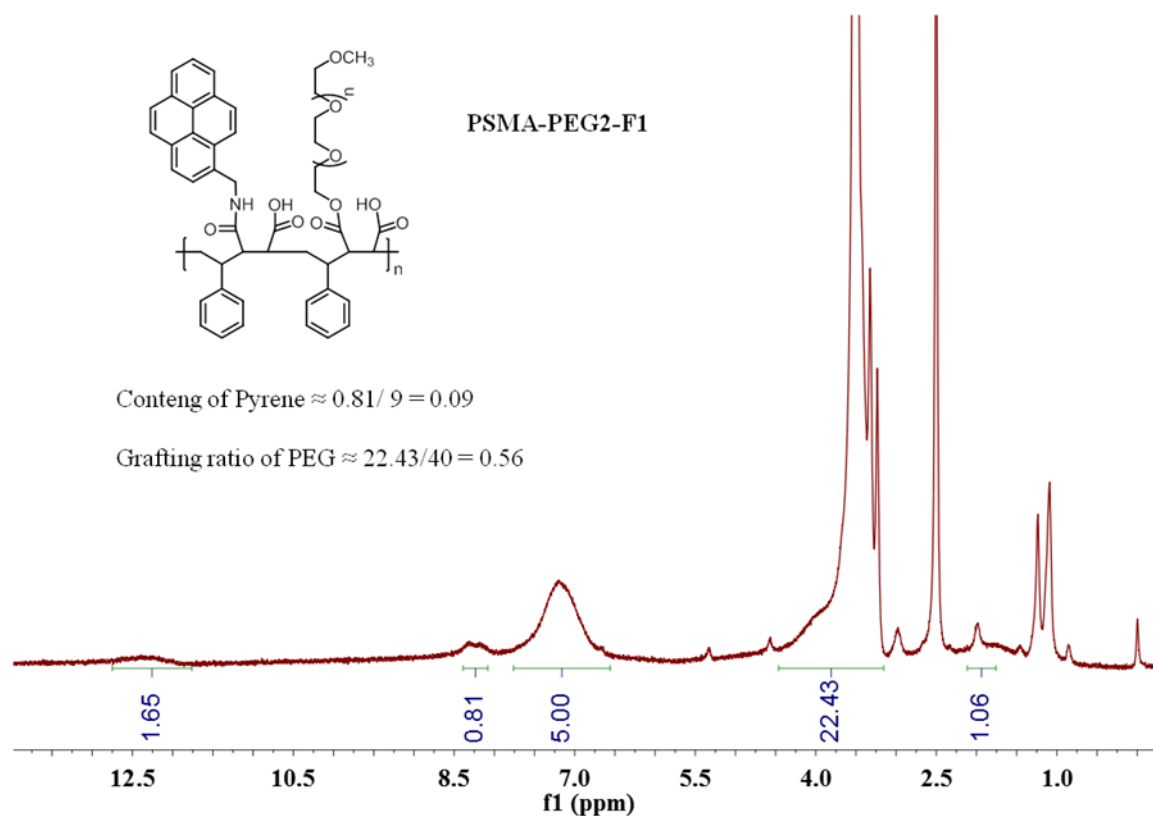

**Figure S19.** The  $^1\text{H}$  NMR of PSMA-PEG2-F1 ( $\text{CDCl}_3$ ).

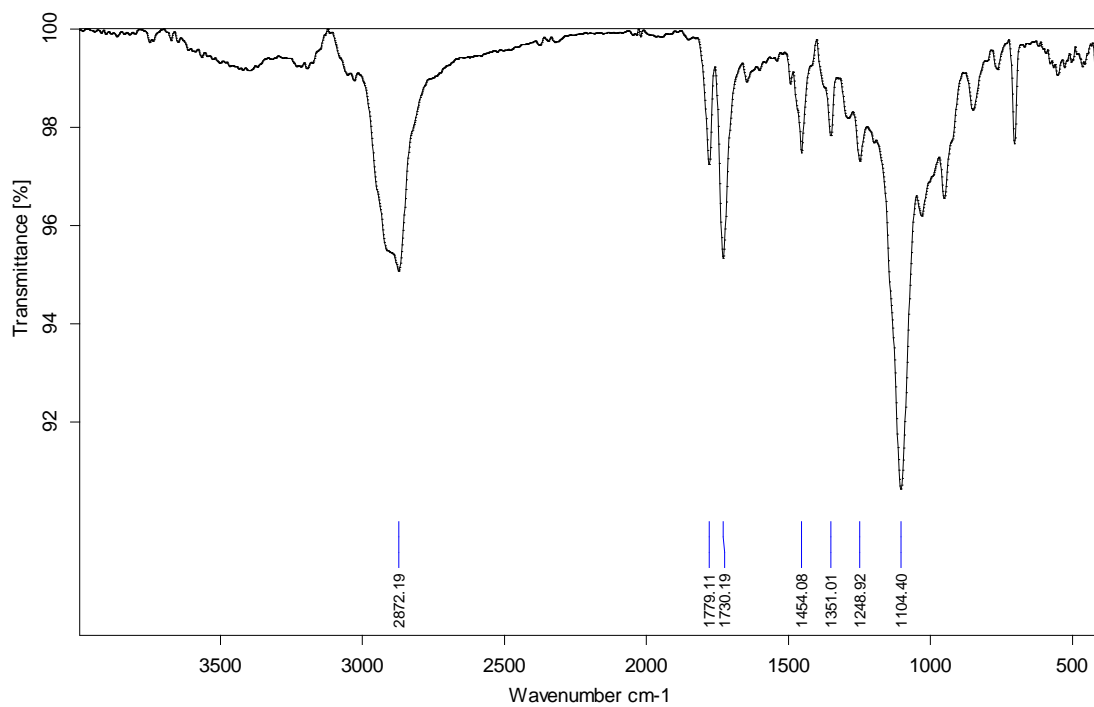

|                                 |                 |            |
|---------------------------------|-----------------|------------|
| D:\wsm\ZL-201212-gongjujiezhi.0 | 20201207-tkbear | 12/12/2020 |
|---------------------------------|-----------------|------------|

**Figure S20.** The IR of PSMA-PEG2-F1.
